# Supplementary material
Source: PubMed Central journal article supplement (PMC3868926)

## **Supplemental Materials and Methods**

### Cell Lines and Treatments

The P493-6 cell line was maintained in RPMI supplemented with 10% fetal bovine serum and antibiotics at 37C and 5% CO<sub>2</sub>. HBL-1, TMD8, U2932, SUDHL4, Pfeiffer, and Karpas 422 cell lines were maintained in RPMI supplemented with 10% fetal bovine serum, 2mM L-glutamine, and antibiotics at 37C and 5% CO<sub>2</sub>. OCI-LY10 and OCI-LY1 cell lines were maintained in IMDM supplemented with 20% fetal bovine serum, 2mM L-glutamine, 50μM β-ME and antibiotics at 37C and 5% CO<sub>2</sub>. P493-6 cells were treated with 1μM doxycycline for 48 hours to repress transgenic Myc. SMARTpool siRNAs, miRNA mimics, and miRNA hairpin inhibitors (Dharmacon) were transfected by electroporation using the AMAXA system and Reagent V (Lonza). Cells were harvested for western blotting and RNA isolation or treated with α-IgM 48 hours after electroporation as described in the text. All siRNA, miRNA mimic, and miRNA hairpin inhibitor treatments (alone or in combination with BCR ligation) were performed at least three times. DLD1 Dicer hypomorph cells were maintained in McCoy's supplemented with 10% fetal bovine serum and antibiotics at 37C and 5% CO<sub>2</sub>. miRNAs (20 nM) and psi-CHECK2 plasmid constructs were transfected using Lipofectamine 2000 (Invitrogen).

### Cytosolic Calcium Measurements

P493-6 cells were loaded with the calcium indicator fura-2 AM (3 μM; Invitrogen) for 20 min at room temperature and then were allowed to adhere to Poly-L-lysine coated coverglass (#1.5, Fisher Scientific) for 5 min. Residual dye and non-adherent cells were removed by perfusing the imaging chamber with extracellular bath solution (155 mM NaCl, 4.5 mM KCl, 2 mM CaCl<sub>2</sub>, 1 mM MgCl<sub>2</sub>, 5 mM glucose, 10 mM HEPES, pH 7.4). Ca<sup>2+</sup> measurements were performed using a Leica DMI 6000 fluorescence microscope equipped with a Hamamatsu Orca ER camera and controlled with Leica Application Suite software. The fluorescence emission ratio at 510 nm was recorded following excitation at 340 and 380 nm with a monochromator (TILL photonics). Intracellular Ca<sup>2+</sup> images were captured every 2 seconds and are represented as the Fura-2 fluorescence emission ratio. After 100 s of baseline recording (40-60 individual cells per experiment) were stimulated by addition of anti-IgM antibody (final concentration = 5 μg/ml) to imaging chamber. Mean Fura-2 ratio values were plotted (Origin Lab, Microcal). Pseudocolor

ratio images at resting and peak cytosolic Ca<sup>2+</sup> concentrations shown are representative of three individual experiments. Statistical analysis (\*\*p < 0.01, \*p < 0.05, n.s.= not significant) of the mean ratio ( $\pm$  S.E.M. n=3) was calculated at each time point with student t-test.

### Western blotting and Antibodies

Western blotting was performed as previously described<sup>31</sup>. Signals were detected by either ECL (Pierce) or Odyssey Infrared Imager (LI-COR Biosciences). Representative blots are shown.

Antibody information is described in the table.

| Antibody             | Dilution | System      | Company        | Catalog # |
|----------------------|----------|-------------|----------------|-----------|
| c-Myc                | 1:500    | ECL         | Calbiochem     | OP10      |
| actin                | 1:50,000 | ECL/Odyssey | Sigma          | A3854     |
| phospho-BLNK         | 1:1000   | Odyssey     | Santa Cruz     | sc-28517  |
| total-BLNK           | 1:1000   | Odyssey     | Santa Cruz     | sc-8003   |
| GAPDH                | 1:20,000 | ECL/Odyssey | Abcam          | ab9484    |
| FCRL4                | 1:1000   | Odyssey     | R&D Systems    | AF2426    |
| FCGR2B               | 1:1000   | Odyssey     | Santa Cruz     | sc-12815  |
| CD22                 | 1:1000   | Odyssey     | Santa Cruz     | sc-7932   |
| CD72                 | 1:1000   | Odyssey     | Santa Cruz     | sc-1707   |
| Pten                 | 1:1000   | Odyssey     | Santa Cruz     | sc-7974   |
| phospho-SYK          | 1:1000   | ECL         | Cell Signaling | #2710     |
| total-SYK            | 1:1000   | Odyssey     | Cell Signaling | #2712     |
| phospho-ERK          | 1:1000   | Odyssey     | Cell Signaling | #9101     |
| total-ERK            | 1:1000   | Odyssey     | Cell Signaling | #9102     |
| phospho-Akt          | 1:1000   | Odyssey     | Cell Signaling | #4060     |
| total-Akt            | 1:1000   | Odyssey     | Cell Signaling | #2920     |
| phospho-GSK3-beta    | 1:1000   | Odyssey     | Cell Signaling | #9323     |
| total-GSK3-beta      | 1:1000   | Odyssey     | Cell Signaling | #9315     |
| phospho-PLCgamma2    | 1:1000   | Odyssey     | Cell Signaling | #3871     |
| total-PLCgamma2      | 1:1000   | Odyssey     | Cell Signaling | #3872     |
| phospho-c-Myc        | 1:1000   | ECL         | Abcam          | ab79318   |
| goat anti-mouse-HRP  | 1:5000   | ECL         | GE Healthcare  | NA931V    |
| goat anti-rabbit-HRP | 1:5000   | ECL         | GE Healthcare  | NA934V    |
| goat anti-mouse-680  | 1:10,000 | Odyssey     | Licor          | 926-32220 |
| goat anti-mouse-800  | 1:10,000 | Odyssey     | Licor          | 926-32210 |
| goat anti-rabbit-680 | 1:10,000 | Odyssey     | Licor          | 827-11081 |
| goat anti-rabbit-800 | 1:10,000 | Odyssey     | Licor          | 926-32211 |
| donkey anti-goat-680 | 1:10,000 | Odyssey     | Licor          | 926-32224 |
| donkey anti-goat-800 | 1:10,000 | Odyssey     | Licor          | 926-32214 |

**Antibody Table:** Table listing the antibodies used in this study. Antibody dilution, detection method, source, and catalog number are shown.

**qPCR**

Total RNA was isolated using TRIzol reagent (Invitrogen). For miRNAs, RT and qPCR was performed using Taqman miRNA assays and Taqman Gene Expression Master Mix (Invitrogen and Life Technologies). miRNA expression was analyzed normalized to that of RNU6B. For mRNAs, cDNAs were prepared with random hexamers using High Capacity cDNA RT kit (Life Technologies). qPCR was performed using PowerSYBR Green PCR Master Mix (Life Technologies). mRNA qPCR oligo sequences are listed in the table below. qPCR reactions were performed on an Applied Biosystems Vii7 machine and analyzed with Vii7 RUO software (Life Technologies).

| Gene    | Strand | Sequence (5`-3`)     |
|---------|--------|----------------------|
| FCRL4   | FWD    | CAGAGATGGCGAGGTCATCC |
|         | REV    | ACCCCTCACTGTTTCAGCAC |
| FCRGR2B | FWD    | ATTCCCACCCACACGCAGCC |
|         | REV    | TGGCACGTGTACTCCCCGCT |
| CD22    | FWD    | CATCTCCTCGGCCCTGGCT  |
|         | REV    | ATCCAGACGCAGGCCCCCTC |
| CD72    | FWD    | CGGTCAAGTCGGAGCAGCCA |
|         | REV    | GGCCGAGCAGGAGGTATCGC |

**qPCR Primers:** Sequences of oligos used for qPCR in this study.

**Luciferase Assay Constructs**

| Construct   | Strand | Sequence (5'-3')                                                                                          |
|-------------|--------|-----------------------------------------------------------------------------------------------------------|
| FCRL4 WT    | top    | TCGAGCTGTGTCTTTGAGTTACTAATTAGTTTATATGAGAATAATTCTTGCAATAA<br>ATGAAGAAGGAATAAAAGAAATAGGAAGCCACAAATTTGTATGC  |
|             | bottom | GGCCGCATACAAATTTGTGGCTTCCTATTTCTTTTATTCCTTCTTCATTTATTGCAA<br>GAATTATTCTCATATAAACTAATTAGTAACTCAAAGACACAGC  |
| FCRL4 mut   | top    | TCGAGCTGTGTCTTTGAGTTACTAATTAGTTTATATGAGAATAATTCTTATGGCA<br>AATGAAGAAGGAATAAAAGAAATAGGAAGCCACAAATTTGTATGC  |
|             | bottom | GGCCGCATACAAATTTGTGGCTTCCTATTTCTTTTATTCCTTCTTCATTTGCCATAA<br>GAATTATTCTCATATAAACTAATTAGTAACTCAAAGACACAGC  |
| FCRGR2B WT  | top    | TCGAGCCTGAAAGCCACAGACAATATGGTCCCAAATAACCGACTGCACCTTCTGT<br>GCTTCAGCTCTTCTTGACATCAAGGCTCTCCGTTCCACATCCGC   |
|             | bottom | GGCCGCGGATGTGGAACGGAAGAGCCTTGATGTCAAGAAGAGCTGAAGCACA<br>GAAGGTGCAGTCGGTTATTTGGGACCATATTGTCTGTGGCTTTCAGGC  |
| FCRGR2B mut | top    | TCGAGCCTGAAAGCCACAGACAATATGGTCCCAAATAACCGACTGCGATCTCTG<br>TGCTTCAGCTCTTCTTGACATCAAGGCTCTCCGTTCCACATCCGC   |
|             | bottom | GGCCGCGGATGTGGAACGGAAGAGCCTTGATGTCAAGAAGAGCTGAAGCACA<br>GAGATCGCAGTCGGTTATTTGGGACCATATTGTCTGTGGCTTTCAGGC  |
| CD22 WT     | top    | TCGAGGAGACCTCCCCGGACTGCGATGACACGGTCACTTATTCAGCATTGCAC<br>AAGCGCCAAGTGGGCGACTATGAGAACGTCATTCCAGATTTTCCGC   |
|             | bottom | GGCCGCGGAAAATCTGGAATGACGTTCTCATAGTCGCCCACTTGGCGCTTGTGC<br>AATGCTGAATAAGTGACCGTGTGCATCGCAGTCCGGGGGAGGTCTCC |
| CD22 mut    | top    | TCGAGGAGACCTCCCCGGACTGCGATGACACGGTCACTTATTCAGCATCATGT<br>AAGCGCCAAGTGGGCGACTATGAGAACGTCATTCCAGATTTTCCGC   |
|             | bottom | GGCCGCGGAAAATCTGGAATGACGTTCTCATAGTCGCCCACTTGGCGCTTACAT<br>GATGCTGAATAAGTGACCGTGTGCATCGCAGTCCGGGGGAGGTCTCC |

**3'UTR Sequences used in Luciferase Sensor Assays:** 100bp oligos (top/bottom) were annealed and ligated into the psi-CHECK2 vector prior to luciferase sensor assays.

## **Supplemental Table Legends**

**Table S1:** List of miRNAs whose seed sequences are significantly enriched for in Myc repressed genes. SigTerms analysis for Myc repressed genes performed as described in Figure 1B. miRNA family, Count in Selected Genes (Myc repressed), Count in Total Population (all genes), and p-value (for significance of enrichment) are shown. A p-value <0.05 was considered significant. Highlighted in gray are miR-17~92 cluster family members.

**Table S2:** List of BCR signaling pathway genes in the GSEA Core Enrichment from the analysis described in Figure 1E. The rank in gene list, rank metric score, running enrichment score, and whether the gene was part of the core enrichment are listed for each gene.

Table S1

| miRNA                                  | Count in Selected Genes | Count in Total Population | P-value     |
|----------------------------------------|-------------------------|---------------------------|-------------|
| miR-17-5p/20/93.mr/106/519.d           | 257                     | 861                       | 4.57757E-13 |
| miR-19                                 | 233                     | 803                       | 1.22339E-10 |
| miR-130/301                            | 181                     | 635                       | 6.09481E-08 |
| miR-101                                | 152                     | 527                       | 3.19812E-07 |
| miR-106/302                            | 152                     | 530                       | 4.64903E-07 |
| miR-29abc                              | 201                     | 739                       | 5.00558E-07 |
| miR-144                                | 158                     | 570                       | 2.57328E-06 |
| miR-30a/30a-5p/30b/30b-5p/30cde/384-5p | 240                     | 934                       | 4.64204E-06 |
| miR-24                                 | 113                     | 392                       | 1.0339E-05  |
| miR-124/506                            | 290                     | 1172                      | 1.27895E-05 |
| miR-25/32/92/92ab/363/367              | 161                     | 607                       | 2.98719E-05 |
| miR-200bc/420                          | 182                     | 702                       | 3.83135E-05 |
| miR-129/129-5p                         | 89                      | 304                       | 4.63514E-05 |
| miR-125/351                            | 144                     | 538                       | 4.81392E-05 |
| miR-181                                | 198                     | 779                       | 6.23717E-05 |
| miR-199/199-5p                         | 96                      | 336                       | 6.69199E-05 |
| miR-448                                | 118                     | 431                       | 8.1477E-05  |
| miR-145                                | 125                     | 466                       | 0.000133324 |
| miR-27ab                               | 199                     | 796                       | 0.000161799 |
| let-7/98                               | 183                     | 726                       | 0.000186473 |
| miR-1/206                              | 136                     | 521                       | 0.000255384 |
| miR-142-3p                             | 68                      | 233                       | 0.000377847 |
| miR-205                                | 73                      | 254                       | 0.000388636 |
| miR-128                                | 169                     | 673                       | 0.000391783 |
| miR-204/211                            | 107                     | 399                       | 0.000394271 |
| miR-153                                | 120                     | 462                       | 0.000698202 |
| miR-410                                | 98                      | 370                       | 0.001049154 |
| miR-377                                | 82                      | 310                       | 0.002656373 |
| miR-26ab/1297                          | 138                     | 561                       | 0.002920415 |
| miR-543                                | 107                     | 422                       | 0.003043551 |
| miR-202/202-3p                         | 129                     | 522                       | 0.003304671 |
| miR-335/335-5p                         | 41                      | 138                       | 0.00352046  |
| miR-326/330/330-5p                     | 66                      | 244                       | 0.003736146 |
| miR-134                                | 28                      | 88                        | 0.005191281 |
| miR-23ab                               | 170                     | 721                       | 0.00656575  |
| miR-299/299-3p                         | 17                      | 47                        | 0.006694901 |
| miR-137                                | 171                     | 726                       | 0.00669797  |
| miR-495/1192                           | 121                     | 501                       | 0.009297715 |
| miR-103/107                            | 102                     | 415                       | 0.009677737 |
| miR-10                                 | 45                      | 163                       | 0.010078127 |
| miR-139-5p                             | 58                      | 220                       | 0.010927588 |
| miR-221/222                            | 67                      | 260                       | 0.011328075 |
| miR-18ab                               | 46                      | 169                       | 0.012195112 |
| miR-122                                | 33                      | 114                       | 0.012367098 |
| miR-22                                 | 73                      | 288                       | 0.012668242 |
| miR-21/590-5p                          | 49                      | 183                       | 0.0136047   |
| miR-186                                | 106                     | 441                       | 0.016173455 |
| miR-182                                | 170                     | 740                       | 0.017466684 |
| miR-149                                | 60                      | 235                       | 0.019089883 |
| miR-214/761                            | 89                      | 367                       | 0.020722141 |
| miR-431                                | 23                      | 77                        | 0.023007859 |
| miR-148/152                            | 112                     | 475                       | 0.023620136 |
| miR-329/362-3p                         | 47                      | 180                       | 0.023915642 |
| miR-140/140-5p/876-3p                  | 55                      | 216                       | 0.025176433 |
| miR-340/340-5p                         | 185                     | 819                       | 0.025324998 |
| miR-133                                | 105                     | 444                       | 0.025624931 |
| miR-219/219-5p                         | 58                      | 230                       | 0.026461986 |
| miR-143                                | 58                      | 230                       | 0.026461986 |
| miR-411                                | 18                      | 58                        | 0.028515933 |
| miR-491/491-5p                         | 24                      | 83                        | 0.030049037 |
| miR-146                                | 29                      | 105                       | 0.033471896 |
| miR-135                                | 105                     | 453                       | 0.042140828 |
| miR-324-5p                             | 21                      | 73                        | 0.042682824 |
| miR-138                                | 81                      | 342                       | 0.043642956 |
| miR-96/1271                            | 155                     | 690                       | 0.044547608 |
| miR-320/320abcd                        | 106                     | 460                       | 0.04749761  |
| miR-132/212                            | 60                      | 247                       | 0.048198374 |
| miR-496                                | 21                      | 74                        | 0.048826871 |
| miR-374/374ab                          | 90                      | 386                       | 0.049565791 |
| miR-758                                | 33                      | 126                       | 0.049587005 |

Table S2

| GENE SYMBOL | GENE_TITLE                                                                                  | RANK IN GENE LIST | RANK METRIC SCORE | RUNNING ES | CORE ENRICHMENT |
|-------------|---------------------------------------------------------------------------------------------|-------------------|-------------------|------------|-----------------|
| LILRB3      | leukocyte immunoglobulin-like receptor, subfamily B (with TM and ITIM domains), member 3    | 82                | 1.497612          | 0.0358117  | Yes             |
| CD72        | CD72 molecule                                                                               | 316               | 1.217139          | 0.0517105  | Yes             |
| CD79B       | CD79b molecule, immunoglobulin-associated beta                                              | 365               | 1.181588          | 0.0812907  | Yes             |
| CD22        | CD22 molecule                                                                               | 458               | 1.130725          | 0.1059406  | Yes             |
| RAC2        | ras-related C3 botulinum toxin substrate 2 (rho family, small GTP binding protein Rac2)     | 469               | 1.123899          | 0.1369072  | Yes             |
| INPP5D      | inositol polyphosphate-5-phosphatase, 145kDa                                                | 478               | 1.116441          | 0.1678217  | Yes             |
| PTPN6       | protein tyrosine phosphatase, non-receptor type 6                                           | 483               | 1.110545          | 0.1988872  | Yes             |
| LYN         | v-yes-1 Yamaguchi sarcoma viral related oncogene homolog                                    | 504               | 1.102927          | 0.2284672  | Yes             |
| NFKBIE      | nuclear factor of kappa light polypeptide gene enhancer in B-cells inhibitor, epsilon       | 583               | 1.064506          | 0.2523573  | Yes             |
| SYK         | spleen tyrosine kinase                                                                      | 606               | 1.0516            | 0.2803281  | Yes             |
| PIK3CD      | phosphoinositide-3-kinase, catalytic, delta polypeptide                                     | 675               | 1.021646          | 0.3038008  | Yes             |
| MALT1       | mucosa associated lymphoid tissue lymphoma translocation gene 1                             | 682               | 1.019721          | 0.3321409  | Yes             |
| IKBKB       | inhibitor of kappa light polypeptide gene enhancer in B-cells, kinase beta                  | 684               | 1.019494          | 0.3608715  | Yes             |
| CD19        | CD19 molecule                                                                               | 980               | 0.907527          | 0.3630991  | Yes             |
| VAV2        | vav 2 oncogene                                                                              | 1030              | 0.889369          | 0.3843421  | Yes             |
| CD79A       | CD79a molecule, immunoglobulin-associated alpha                                             | 1079              | 0.874241          | 0.4052369  | Yes             |
| CD81        | CD81 molecule                                                                               | 1119              | 0.860496          | 0.4264578  | Yes             |
| PPP3CC      | protein phosphatase 3 (formerly 2B), catalytic subunit, gamma isoform                       | 1183              | 0.842902          | 0.4452763  | Yes             |
| PIK3R5      | phosphoinositide-3-kinase, regulatory subunit 5, p101                                       | 1239              | 0.825645          | 0.4642422  | Yes             |
| NFATC2      | nuclear factor of activated T-cells, cytoplasmic, calcineurin-dependent 2                   | 1355              | 0.789222          | 0.4774157  | Yes             |
| NFKB2       | nuclear factor of kappa light polypeptide gene enhancer in B-cells 2 (p49/p100)             | 1453              | 0.763531          | 0.4912922  | Yes             |
| AKT3        | v-akt murine thymoma viral oncogene homolog 3 (protein kinase B, gamma)                     | 1463              | 0.761216          | 0.512089   | Yes             |
| NFAT5       | nuclear factor of activated T-cells 5, tonicity-responsive                                  | 1547              | 0.740658          | 0.5264305  | Yes             |
| VAV1        | vav 1 oncogene                                                                              | 1657              | 0.712369          | 0.5379085  | Yes             |
| PRKCB1      | protein kinase C, beta 1                                                                    | 1682              | 0.70515           | 0.5559302  | Yes             |
| GSK3B       | glycogen synthase kinase 3 beta                                                             | 1785              | 0.679978          | 0.5670486  | Yes             |
| NRAS        | neuroblastoma RAS viral (v-ras) oncogene homolog                                            | 1995              | 0.630941          | 0.5682872  | Yes             |
| PPP3CB      | protein phosphatase 3 (formerly 2B), catalytic subunit, beta isoform (calcineurin A beta)   | 2221              | 0.577061          | 0.566733   | Yes             |
| PIK3CA      | phosphoinositide-3-kinase, catalytic, alpha polypeptide                                     | 2291              | 0.559542          | 0.5770677  | Yes             |
| IKBKG       | inhibitor of kappa light polypeptide gene enhancer in B-cells, kinase gamma                 | 2333              | 0.551841          | 0.5894075  | Yes             |
| NFKBIA      | nuclear factor of kappa light polypeptide gene enhancer in B-cells inhibitor, alpha         | 2345              | 0.548847          | 0.6040442  | Yes             |
| PLCG2       | phospholipase C, gamma 2 (phosphatidylinositol-specific)                                    | 2725              | 0.480303          | 0.5875306  | No              |
| IFITM1      | interferon induced transmembrane protein 1 (9-27)                                           | 2782              | 0.470827          | 0.5963903  | No              |
| NFKB1       | nuclear factor of kappa light polypeptide gene enhancer in B-cells 1 (p105)                 | 2965              | 0.438817          | 0.594343   | No              |
| BLNK        | B-cell linker                                                                               | 3119              | 0.41018           | 0.5937885  | No              |
| NFATC3      | nuclear factor of activated T-cells, cytoplasmic, calcineurin-dependent 3                   | 3509              | 0.341426          | 0.5725566  | No              |
| VAV3        | vav 3 oncogene                                                                              | 4166              | 0.247813          | 0.5274836  | No              |
| FCGR2B      | Fc fragment of IgG, low affinity IIb, receptor (CD32)                                       | 4320              | 0.223402          | 0.521651   | No              |
| FOS         | v-fos FBJ murine osteosarcoma viral oncogene homolog                                        | 4422              | 0.210078          | 0.5195699  | No              |
| PIK3R1      | phosphoinositide-3-kinase, regulatory subunit 1 (p85 alpha)                                 | 4512              | 0.196047          | 0.5180448  | No              |
| BTK         | Bruton agammaglobulinemia tyrosine kinase                                                   | 5425              | 0.070241          | 0.4476316  | No              |
| NFATC1      | nuclear factor of activated T-cells, cytoplasmic, calcineurin-dependent 1                   | 5545              | 0.054297          | 0.4397193  | No              |
| CARD11      | caspase recruitment domain family, member 11                                                | 6312              | -0.04503          | 0.3801836  | No              |
| AKT2        | v-akt murine thymoma viral oncogene homolog 2                                               | 6651              | -0.08759          | 0.355827   | No              |
| NFKBIB      | nuclear factor of kappa light polypeptide gene enhancer in B-cells inhibitor, beta          | 8316              | -0.30724          | 0.2324145  | No              |
| PIK3CB      | phosphoinositide-3-kinase, catalytic, beta polypeptide                                      | 9113              | -0.41921          | 0.1810712  | No              |
| PPP3CA      | protein phosphatase 3 (formerly 2B), catalytic subunit, alpha isoform (calcineurin A alpha) | 9495              | -0.47929          | 0.1643702  | No              |
| RAC1        | ras-related C3 botulinum toxin substrate 1 (rho family, small GTP binding protein Rac1)     | 10371             | -0.66127          | 0.1135961  | No              |
| PPP3R1      | protein phosphatase 3 (formerly 2B), regulatory subunit B, 19kDa, alpha isoform             | 10737             | -0.75501          | 0.1059569  | No              |
| KRAS        | v-Ki-ras2 Kirsten rat sarcoma viral oncogene homolog                                        | 10753             | -0.76036          | 0.1262532  | No              |
| HRAS        | v-Ha-ras Harvey rat sarcoma viral oncogene homolog                                          | 11079             | -0.85002          | 0.1244743  | No              |

## Supplemental Figure Legends

**Figure S1. A.** P493-6 cells were grown and treated with control mimic or miR-17~92 mimic mix for 48 hours prior to treatment with immobilized anti-IgM for 6 hours. Western blotting was performed for P-LYN, total-LYN, and GAPDH. **B-C,** Western blotting was performed for P-SYK, total-SYK, P-BLNK, total-BLNK, and GAPDH. **B.** P493-6 cells were grown and treated with control mimic or miR-17~92 mimic mix for 48 hours prior to addition of 10  $\mu\text{g}/\text{mL}$  soluble anti-IgM for 15 minutes. **C.** P493-6 cells were grown and treated with control mimic or miR-17~92 mimic mix for 48 hours prior to treatment with immobilized anti-IgM (imm- $\alpha$ -IgM) or immobilized isotype control (imm-isotype-CTRL) for 6 hours. **D-E.** P493-6 cells grown in the absence (Myc<sup>HIGH</sup>) or presence (Myc<sup>LOW</sup>) of 1  $\mu\text{M}$  doxycycline were treated with control mimic or miR-17~92 mimic mix for 48 hours. Changes in CD72 (**D**) and FCRL4 (**E**) protein levels were examined by Western blotting. GAPDH was utilized as a loading control. **F.** Dual luciferase assays performed in HCT-116 Dicer hypomorph cells cotransfected with FCRL4 3'UTR luciferase sensors and either control or miRNA mimics. Schematic of predicted 3'UTR-miRNA interactions are depicted (top panel). Shaded nucleotides indicate regions mutated to disrupt the mRNA-miRNA interaction in the mut 3'UTR constructs. Changes in luciferase activity upon treatment with miRNA mimics are plotted (bottom panel). Values were normalized to luciferase activity from control mimic transfected cells. Error bars represent standard deviation of 3 independent experiments.

**Figure S2. A.** P493-6 cells were treated, or not, with 1  $\mu\text{M}$  doxycycline for 48 hours prior to addition of 10  $\mu\text{g}/\text{mL}$  soluble anti-IgM for 2 minutes. Western blotting was performed for P-PLC $\gamma$ 2, total-PLC $\gamma$ 2, and actin. Bands were quantified and the ratio of P-PLC $\gamma$ 2/total-PLC $\gamma$ 2 is shown. **B.** P493-6 cells were left untreated, or treated with 1  $\mu\text{M}$  doxycycline for 24 hours or 48 hours prior to addition of anti-IgM. Cytosolic Ca<sup>2+</sup> levels in P493-6 cells were monitored by fluorescence microscopy using the ratiometric Ca<sup>2+</sup> indicator dye Fura-2. Mean trace of three independent experiments are plotted (top); n.s.= not significant. **C-D.** Independent triplicate cytosolic Ca<sup>2+</sup> measurements following BCR crosslinking by anti-IgM. Cytosolic Ca<sup>2+</sup> levels in P493-6 cells were monitored by fluorescence microscopy using the ratiometric Ca<sup>2+</sup> indicator dye Fura-2. **C.** P493-6 cells were grown in the presence (MYC<sup>LOW</sup>) of 1  $\mu\text{M}$  doxycycline and treated with control mimic or miR-17~92 mimic mix for 48 hours prior to addition of anti-IgM.



**D.** P493-6 cells (MYC<sup>HIGH</sup>) were treated with control short hairpin inhibitor or miR-17~92 short hairpin inhibitor mix for 48 hours prior to addition of anti-IgM. **E.** P493-6 cells were grown in the absence (Myc<sup>HIGH</sup>) or presence (Myc<sup>LOW</sup>) of 1  $\mu$ M doxycycline and treated with control mimic or miR-17~92 mimic mix for 48 hours prior to treatment with immobilized anti-IgM (imm- $\alpha$ -IgM) or immobilized isotype control (imm-isotype-CTRL) for 6 hours. Western blotting was performed for P-ERK, total-ERK, Myc, and GAPDH.

**Figure S3. A.** DLBCL cell line subtype by COO and CCC classifications. For **B-D.** The HBL-1, TMD8, U2932, OCI-LY10, OCI-LY1, SUDHL4, Pfeiffer, Karpas 422, and P493-6 cell lines were grown and harvested for protein extract and RNA isolation. **B.** Western blotting was performed for Myc, P-Myc Ser62, and actin. **C.** qPCR was performed for the *mir17hg* primary transcript and miR-17~92 mature microRNAs. U1 and RNU6B RNAs (respectively) were used as loading controls. Levels are relative to the P493-6 cell line. **D.** Western blotting was performed for SYK, BLNK, and actin. **E.** Normalized levels of *mir17hg* were plotted versus the average mature miR-17~92 abundance for DLBCL tumors. Linear regression was performed and the R value and Pearson correlation p-value are shown.





**Figure S3**

**A**

|            | COO       | CCC    |
|------------|-----------|--------|
| HBL-1      | ABC-DLBCL | BCR    |
| TMD8       | ABC-DLBCL | BCR    |
| U2932      | ABC-DLBCL | BCR    |
| OCI-LY10   | ABC-DLBCL | BCR    |
| SUDHL4     | GCB-DLBCL | BCR    |
| OCI-LY1    | GCB-DLBCL | BCR    |
| Pfeiffer   | GCB-DLBCL | OxPhos |
| Karpas 422 | GCB-DLBCL | OxPhos |

**B**

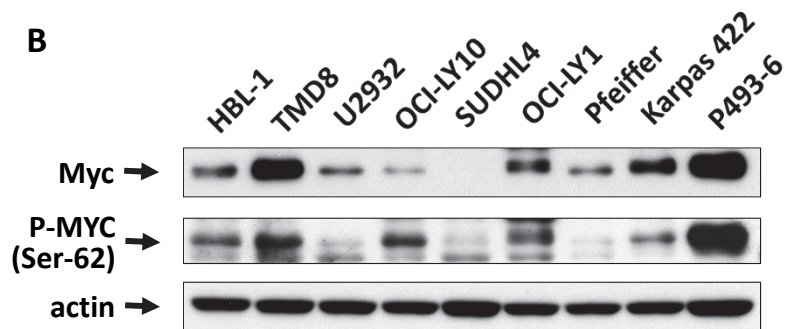

**C**

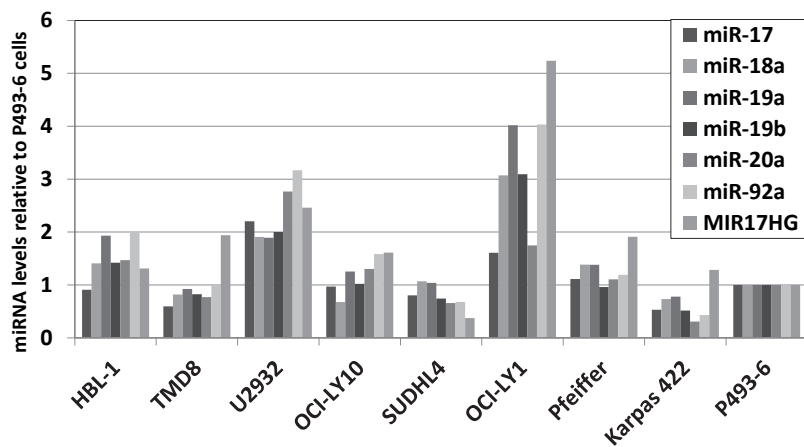

**D**

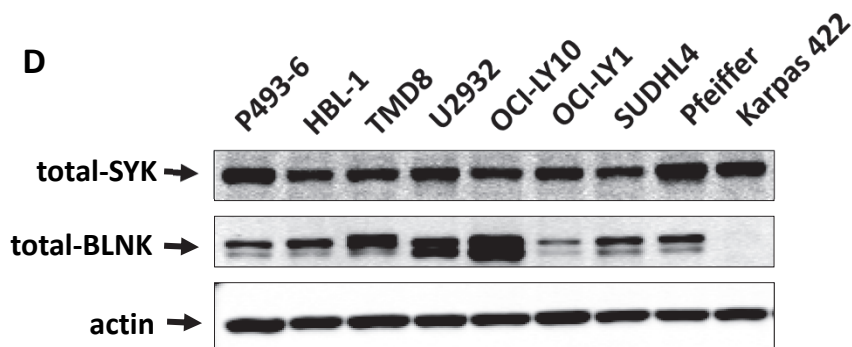

**E**

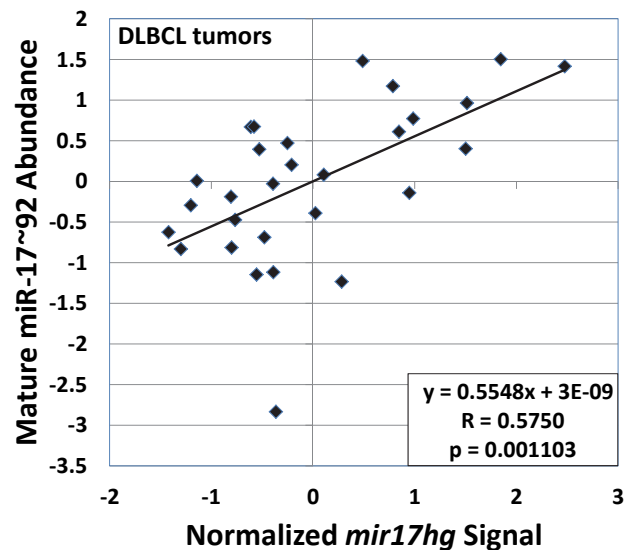

Supplement: supp_blood-2012-12-473090_blood-2012-12-473090-1.pdf [file supp_blood-2012-12-473090_blood-2012-12-473090-1.pdf]
